# Supplementary material for: Photo-aging of brominated epoxy microplastics in water under simulated solar irradiation
Source: Royal Society of Chemistry journal article supplement (doi:10.1039/d4em00208c), 2024-01-01
Supplement: d4em00208c2.pdf [file d4em00208c2.pdf]

Supplementary Information ( contain data )

The figure data can be opened through Origin 2021.

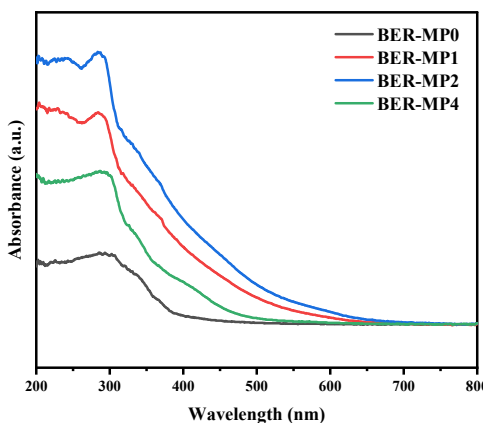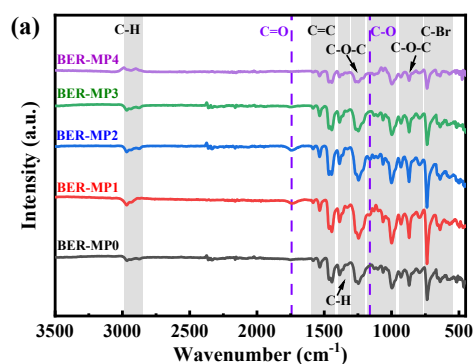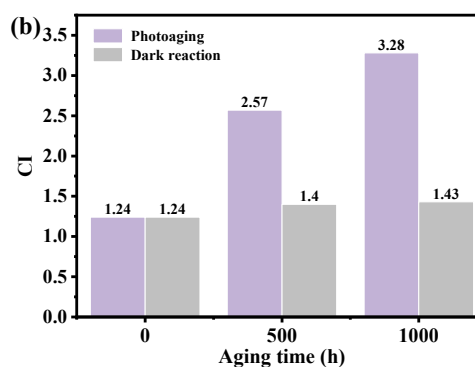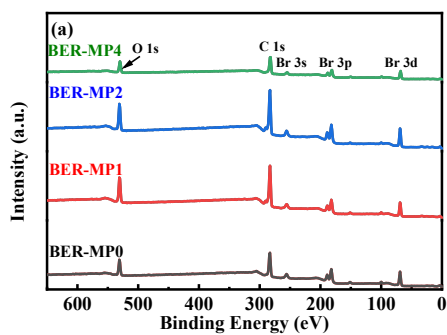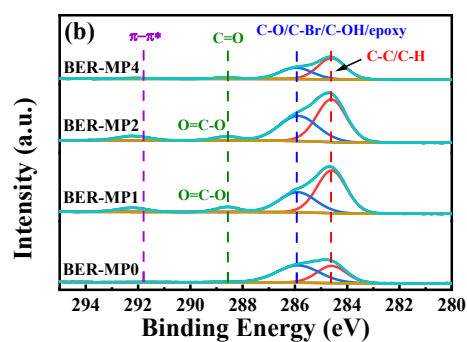

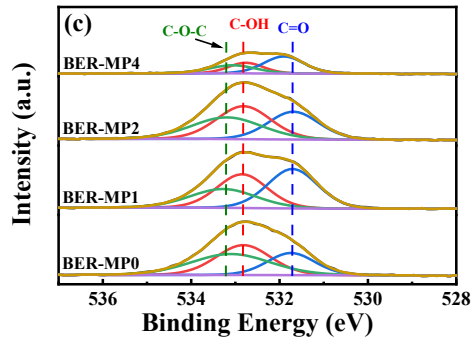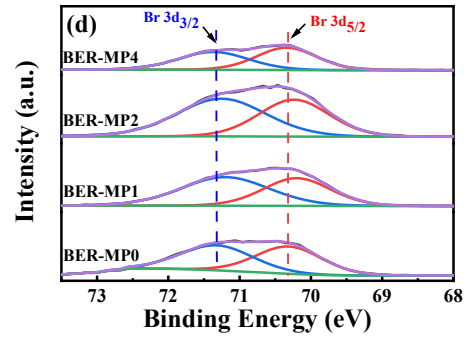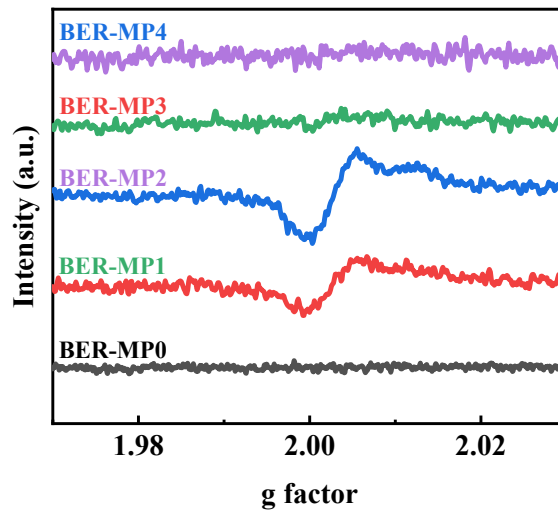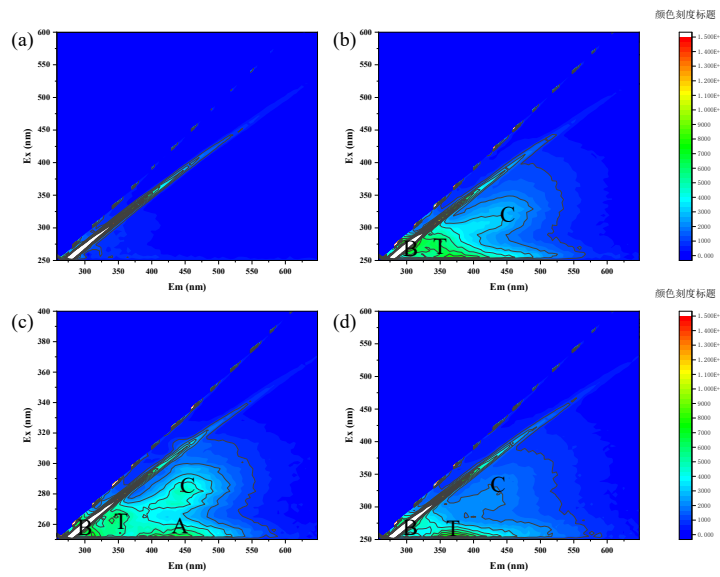

The following data is in image format



Table 1 GPC date

样品详细信息

序列名称 DMF-20221112

| 样品名称   | 进样# | 采集方法        | 数据文件                               | 进样日期                         | 分析方法             | 上次更改                         |
|--------|-----|-------------|------------------------------------|------------------------------|------------------|------------------------------|
| 7812-1 | 1   | GPC-DMF.amx | 2022-11-12<br>12-33-57+08-00-02.dx | 2022-11-12<br>12:35:12+08:00 | DMF-20221105.pmx | 2022-11-12<br>16:11:17+08:00 |

峰结果

| 样品名称   | 进样# | 信号名称  | 峰起始保留时间 (min) | 保留时间 (min) | 峰结尾保留时间 (min) | 面积           | 面积 %   |
|--------|-----|-------|---------------|------------|---------------|--------------|--------|
| 7812-1 | 1   | RID1A | 7.257         | 8.366      | 9.981         | 1966984.8295 | 100.00 |

平均重均分子量

| 样品名称   | 数据文件                            | 峰 # | 保留时间 (min) | 峰尖分子量 (g/mol) | 数均分子量 (g/mol) | 重均分子量 (g/mol) | Z均分子量 (g/mol) | Z+1均分子量 (g/mol) | 多分散性     |
|--------|---------------------------------|-----|------------|---------------|---------------|---------------|---------------|-----------------|----------|
| 7812-1 | 2022-11-12 12-33-57+08-00-02.dx | 1   | 8.366      | 30468         | 15951         | 33180         | 54122         | 75933           | 2.080120 |

分子量分布图

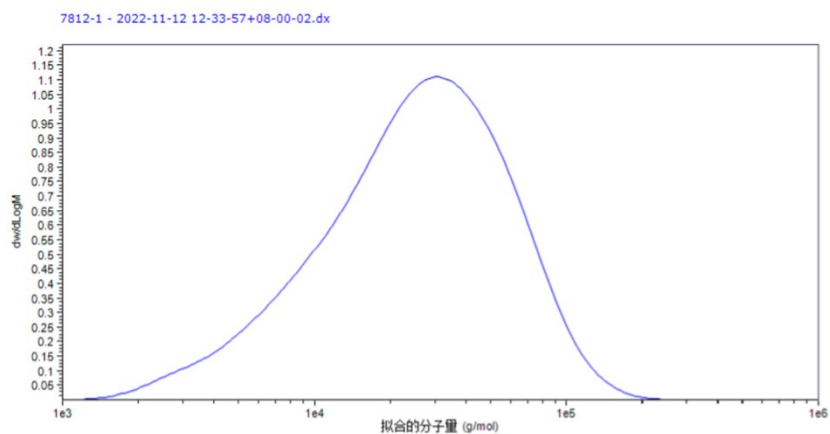

## 样品详细信息

序列名称 DMF-20221112

| 样品名称   | 进样# | 采集方法        | 数据文件                                   | 进样日期                             | 分析方法                 | 上次更改                         |
|--------|-----|-------------|----------------------------------------|----------------------------------|----------------------|------------------------------|
| 7812-2 | 1   | GPC-DMF.amx | 2022-11-12<br>12-50-21+08-<br>00-03.dx | 2022-11-12<br>12:51:32+08:<br>00 | DMF-<br>20221105.pmx | 2022-11-12<br>16:11:32+08:00 |

## 峰结果

| 样品名称   | 进样# | 信号名称  | 峰起始保留<br>时间 (min) | 保留时间<br>(min) | 峰结尾保留<br>时间 (min) | 面积          | 面积 %   |
|--------|-----|-------|-------------------|---------------|-------------------|-------------|--------|
| 7812-2 | 1   | RID1A | 7.257             | 8.398         | 9.873             | 952409.7240 | 100.00 |

## 平均重均分子量

| 样品名称   | 数据文件                                        | 峰 # | 保留<br>时间<br>(min) | 峰尖分<br>子量<br>(g/mol) | 数均分<br>子量<br>(g/mol) | 重均分<br>子量<br>(g/mol) | Z<br>均分子量<br>(g/mol) | Z+1均分<br>子量<br>(g/mol) | 多分散性     |
|--------|---------------------------------------------|-----|-------------------|----------------------|----------------------|----------------------|----------------------|------------------------|----------|
| 7812-2 | 2022-11-<br>12 12-50-<br>21+08-00-<br>03.dx | 1   | 8.398             | 28321                | 14815                | 31590                | 54192                | 78918                  | 2.132298 |

## 分子量分布图

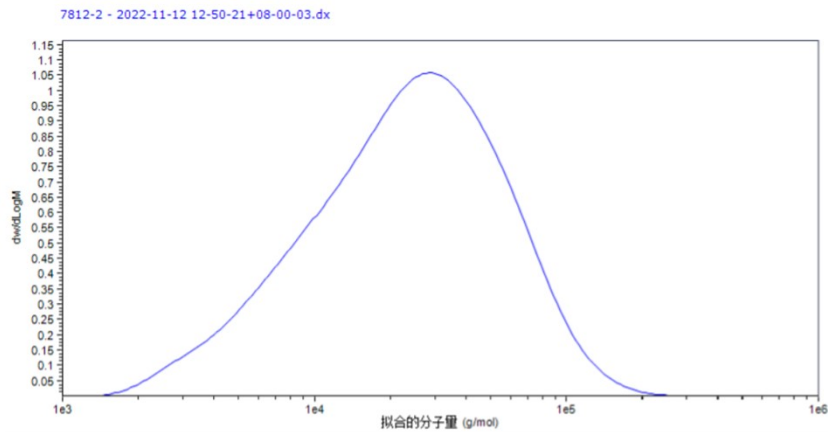

## 样品详细信息

序列名称 有机-  
20221108-1

| 样品名称   | 进样# | 采集方法        | 数据文件                               | 进样日期                         | 分析方法                 | 上次更改                         |
|--------|-----|-------------|------------------------------------|------------------------------|----------------------|------------------------------|
| 7812-3 | 1   | GPC-DMF.amx | 2022-11-12<br>14-00-59+08-00-01.dx | 2022-11-12<br>14:02:10+08:00 | DMF-<br>20221105.pmx | 2022-11-12<br>16:22:45+08:00 |

## 峰结果

| 样品名称   | 进样# | 信号名称  | 峰起始保留<br>时间 (min) | 保留时间<br>(min) | 峰结尾保留<br>时间 (min) | 面积          | 面积 %   |
|--------|-----|-------|-------------------|---------------|-------------------|-------------|--------|
| 7812-3 | 1   | RID1A | 6.978             | 8.380         | 9.917             | 881751.9504 | 100.00 |

## 平均重均分子量

| 样品名称   | 数据文件                            | 峰 # | 保留<br>时间<br>(min) | 峰尖分<br>子量<br>(g/mol) | 数均分<br>子量<br>(g/mol) | 重均分<br>子量<br>(g/mol) | z<br>均分子量<br>(g/mol) | z+1均分<br>子量<br>(g/mol) | 多分散性     |
|--------|---------------------------------|-----|-------------------|----------------------|----------------------|----------------------|----------------------|------------------------|----------|
| 7812-3 | 2022-11-12 14-00-59+08-00-01.dx | 1   | 8.380             | 29590                | 15323                | 32473                | 54398                | 77580                  | 2.119233 |

## 分子量分布图

7812-3 - 2022-11-12 14-00-59+08-00-01.dx

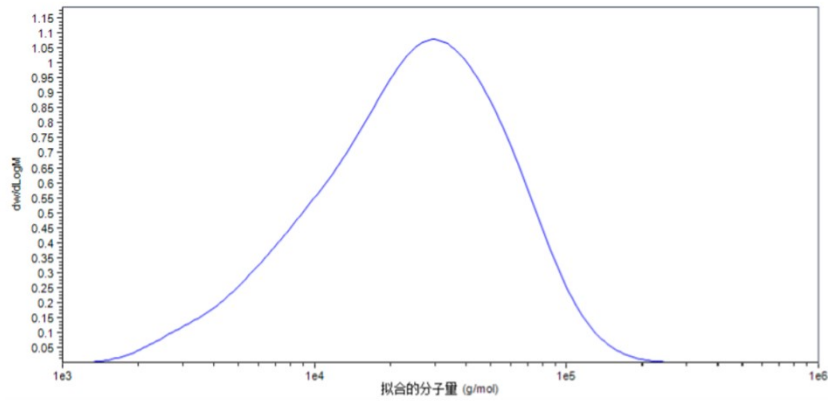

## 样品详细信息

序列名称 有机-  
20221108-1

| 样品名称   | 进样# | 采集方法        | 数据文件                               | 进样日期                         | 分析方法                 | 上次更改                         |
|--------|-----|-------------|------------------------------------|------------------------------|----------------------|------------------------------|
| 7812-4 | 1   | GPC-DMF.amx | 2022-11-12<br>14-17-21+08-00-02.dx | 2022-11-12<br>14:18:31+08:00 | DMF-<br>20221105.pmx | 2022-11-12<br>16:22:55+08:00 |

## 峰结果

| 样品名称   | 进样# | 信号名称  | 峰起始保留<br>时间 (min) | 保留时间<br>(min) | 峰结尾保留<br>时间 (min) | 面积         | 面积 %   |
|--------|-----|-------|-------------------|---------------|-------------------|------------|--------|
| 7812-4 | 1   | RID1A | 7.207             | 8.365         | 9.724             | 90736.8082 | 100.00 |

## 平均重均分子量

| 样品名称   | 数据文件                            | 峰 # | 保留<br>时间<br>(min) | 峰尖分<br>子量<br>(g/mol) | 数均分<br>子量<br>(g/mol) | 重均分<br>子量<br>(g/mol) | z<br>均分子量<br>(g/mol) | z+1均分<br>子量<br>(g/mol) | 多分散性     |
|--------|---------------------------------|-----|-------------------|----------------------|----------------------|----------------------|----------------------|------------------------|----------|
| 7812-4 | 2022-11-12 14-17-21+08-00-02.dx | 1   | 8.365             | 30917                | 17655                | 34366                | 55078                | 76317                  | 1.946531 |

## 分子量分布图

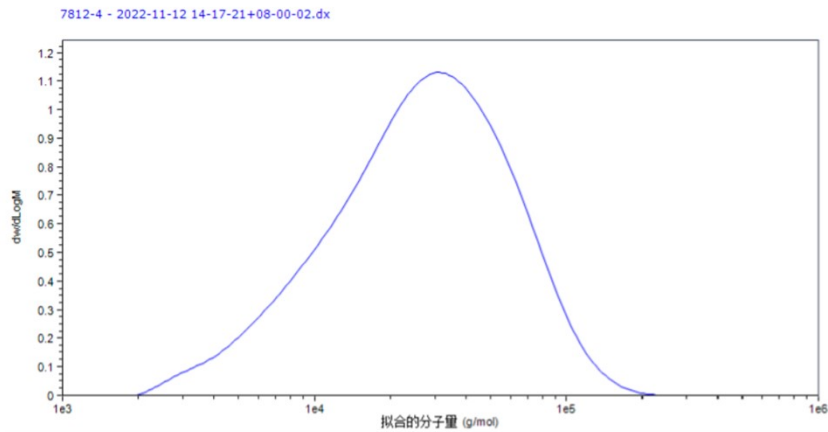

## 样品详细信息

序列名称 有机-  
20221108-1

| 样品名称   | 进样# | 采集方法        | 数据文件                               | 进样日期                         | 分析方法                 | 上次更改                         |
|--------|-----|-------------|------------------------------------|------------------------------|----------------------|------------------------------|
| 7812-5 | 1   | GPC-DMF.amx | 2022-11-12<br>14-33-41+08-00-03.dx | 2022-11-12<br>14:34:50+08:00 | DMF-<br>20221105.pmx | 2022-11-12<br>16:22:59+08:00 |

## 峰结果

| 样品名称   | 进样# | 信号名称  | 峰起始保留<br>时间 (min) | 保留时间<br>(min) | 峰结尾保留<br>时间 (min) | 面积         | 面积 %   |
|--------|-----|-------|-------------------|---------------|-------------------|------------|--------|
| 7812-5 | 1   | RID1A | 7.322             | 8.416         | 9.758             | 41351.1865 | 100.00 |

## 平均重均分子量

| 样品名称   | 数据文件                            | 峰 # | 保留<br>时间<br>(min) | 峰尖分<br>子量<br>(g/mol) | 数均分<br>子量<br>(g/mol) | 重均分<br>子量<br>(g/mol) | z<br>均分子量<br>(g/mol) | z+1均分<br>子量<br>(g/mol) | 多分散性     |
|--------|---------------------------------|-----|-------------------|----------------------|----------------------|----------------------|----------------------|------------------------|----------|
| 7812-5 | 2022-11-12 14-33-41+08-00-03.dx | 1   | 8.416             | 27910                | 15530                | 31544                | 53370                | 77003                  | 2.031165 |

## 分子量分布图

7812-5 - 2022-11-12 14-33-41+08-00-03.dx

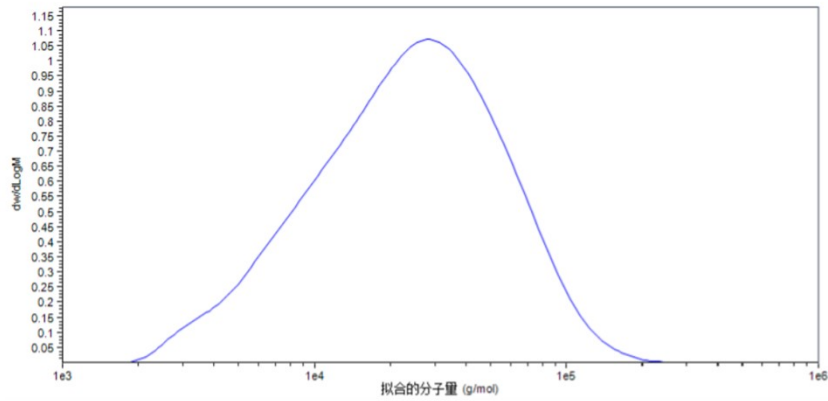



Table 2 Ion chromatograms date

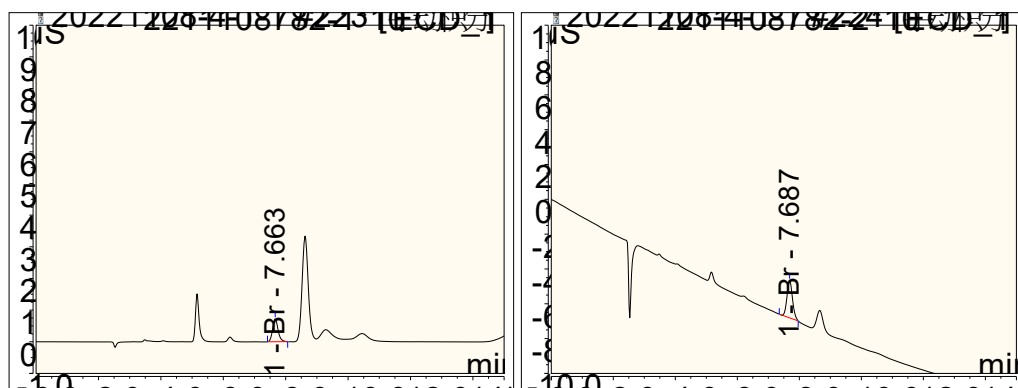

Table S1 GPC date

GPC/SEC 序列报告 

样品详细信息

序列名称 有机-20240531

| 样品名称 | 进样# | 采集方法        | 数据文件                            | 进样日期                      | 分析方法                | 上次更改                      |
|------|-----|-------------|---------------------------------|---------------------------|---------------------|---------------------------|
| 1164 | 1   | GPC-DMF.amx | 2024-05-31 08-08-17+08-00-01.dx | 2024-05-31 08:09:34+08:00 | DMF-PS-20240224.pmx | 2024-05-31 14:53:35+08:00 |

峰结果

| 样品名称 | 进样# | 信号名称  | 峰起始保留时间 (min) | 保留时间 (min) | 峰结尾保留时间 (min) | 面积          | 面积 %   |
|------|-----|-------|---------------|------------|---------------|-------------|--------|
| 1164 | 1   | RID1A | 7.186         | 8.196      | 9.476         | 689992.4716 | 100.00 |

平均重均分子量

| 样品名称 | 数据文件                            | 峰 # | 保留时间 (min) | 峰尖分子量 (g/mol) | 数均分子量 (g/mol) | 重均分子量 (g/mol) | Z 均分子量 (g/mol) | Z+1均分子量 (g/mol) | 多分散性     |
|------|---------------------------------|-----|------------|---------------|---------------|---------------|----------------|-----------------|----------|
| 1164 | 2024-05-31 08-08-17+08-00-01.dx | 1   | 8.196      | 42325         | 23798         | 41001         | 62176          | 83647           | 1.722876 |

分子量分布图

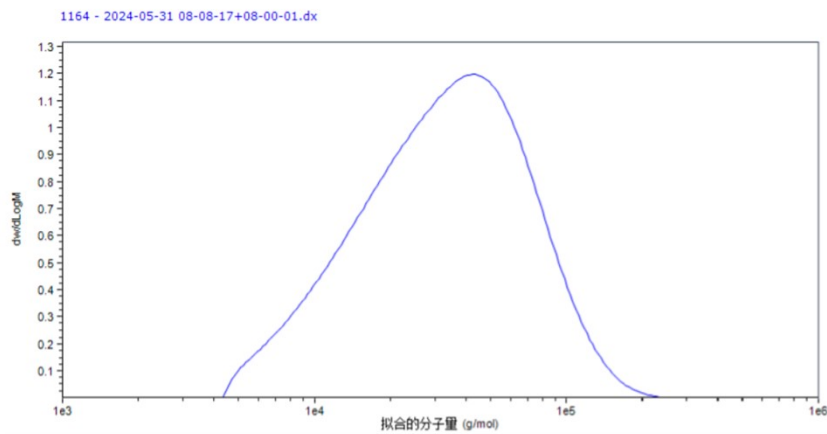

## 样品详细信息

序列名称 有机-  
20240531

| 样品名称 | 进样# | 采集方法        | 数据文件                               | 进样日期                         | 分析方法                    | 上次更改                         |
|------|-----|-------------|------------------------------------|------------------------------|-------------------------|------------------------------|
| 6250 | 1   | GPC-DMF.amx | 2024-05-31<br>11-41-07+08-00-14.dx | 2024-05-31<br>11:42:18+08:00 | DMF-PS-<br>20240224.pmx | 2024-05-31<br>14:53:27+08:00 |

## 峰结果

| 样品名称 | 进样# | 信号名称  | 峰起始保留<br>时间 (min) | 保留时间<br>(min) | 峰结尾保留<br>时间 (min) | 面积          | 面积 %   |
|------|-----|-------|-------------------|---------------|-------------------|-------------|--------|
| 6250 | 1   | RID1A | 7.248             | 8.184         | 9.422             | 451561.0077 | 100.00 |

## 平均重均分子量

| 样品名称 | 数据文件                            | 峰 # | 保留<br>时间<br>(min) | 峰尖分<br>子量<br>(g/mol) | 数均分<br>子量<br>(g/mol) | 重均分<br>子量<br>(g/mol) | z<br>均分子量<br>(g/mol) | z+1均分<br>子量<br>(g/mol) | 多分散性     |
|------|---------------------------------|-----|-------------------|----------------------|----------------------|----------------------|----------------------|------------------------|----------|
| 6250 | 2024-05-31 11-41-07+08-00-14.dx | 1   | 8.184             | 43977                | 26203                | 43173                | 63829                | 84577                  | 1.647636 |

## 分子量分布图

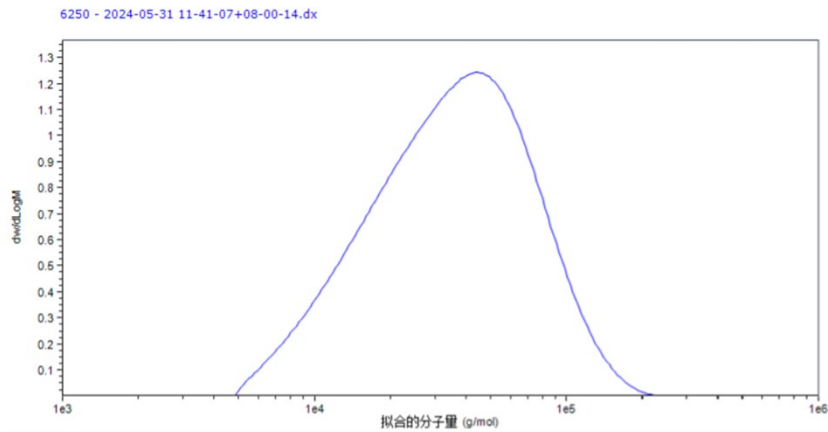

## 样品详细信息

序列名称 有机-  
20240520

| 样品名称   | 进样# | 采集方法        | 数据文件                               | 进样日期                         | 分析方法                    | 上次更改                         |
|--------|-----|-------------|------------------------------------|------------------------------|-------------------------|------------------------------|
| 6250-2 | 1   | GPC-DMF.amx | 2024-05-20<br>14-36-58+08-00-03.dx | 2024-05-20<br>14:38:12+08:00 | DMF-PS-<br>20240224.pmx | 2024-05-20<br>15:44:22+08:00 |

## 峰结果

| 样品名称   | 进样# | 信号名称  | 峰起始保留<br>时间 (min) | 保留时间<br>(min) | 峰结尾保留<br>时间 (min) | 面积          | 面积 %   |
|--------|-----|-------|-------------------|---------------|-------------------|-------------|--------|
| 6250-2 | 1   | RID1A | 7.143             | 8.184         | 9.407             | 268126.5145 | 100.00 |

## 平均重均分子量

| 样品名称   | 数据文件                                        | 峰 # | 保留<br>时间<br>(min) | 峰尖分<br>子量<br>(g/mol) | 数均分<br>子量<br>(g/mol) | 重均分<br>子量<br>(g/mol) | z<br>均分子量<br>(g/mol) | z+1均分<br>子量<br>(g/mol) | 多分散性     |
|--------|---------------------------------------------|-----|-------------------|----------------------|----------------------|----------------------|----------------------|------------------------|----------|
| 6250-2 | 2024-05-<br>20 14-36-<br>58+08-00-<br>03.dx | 1   | 8.184             | 43977                | 26435                | 43237                | 63799                | 84673                  | 1.635597 |

## 分子量分布图

6250-2 - 2024-05-20 14-36-58+08-00-03.dx

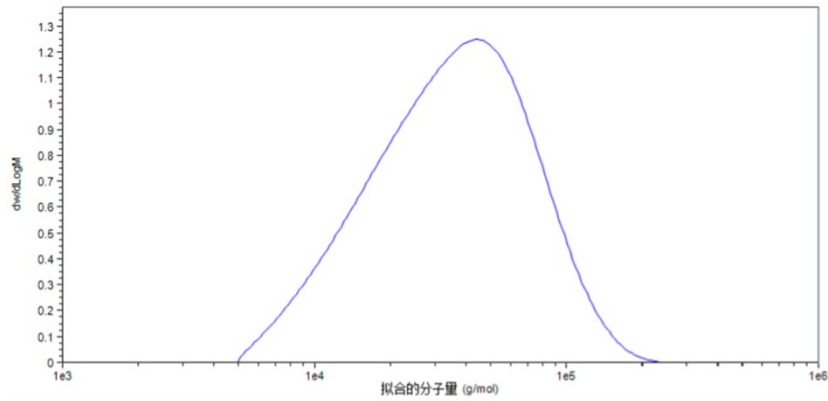

Table S2 EDS date

# EDAX APEX

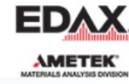

220119

Author:

Creation:

Sample Name: 1

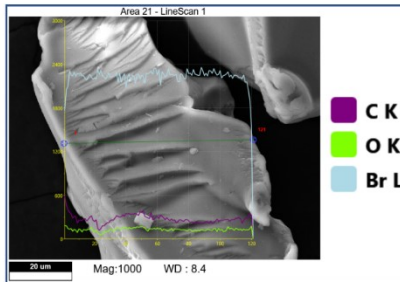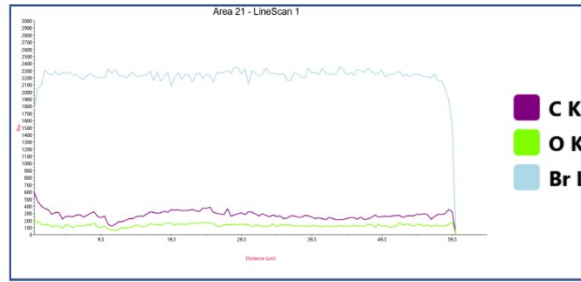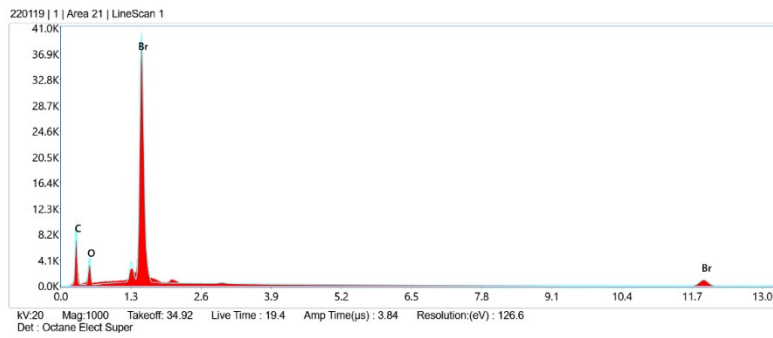

### eZAF Quant Result

| Element | Weight % | MDL  | Atomic % | Error % | Net Int. | R      | A      | F      |
|---------|----------|------|----------|---------|----------|--------|--------|--------|
| C K     | 61.40    | 0.36 | 82.56    | 10.91   | 2190.68  | 0.8903 | 0.0583 | 1.0000 |
| O K     | 11.95    | 0.12 | 12.06    | 11.15   | 1182.59  | 0.9019 | 0.0631 | 1.0000 |
| Br L    | 26.65    | 0.1  | 5.38     | 5.02    | 13281.21 | 0.9236 | 0.6102 | 1.0013 |

220119

Author:

Creation:

Sample Name: 2

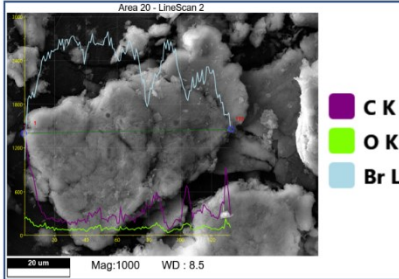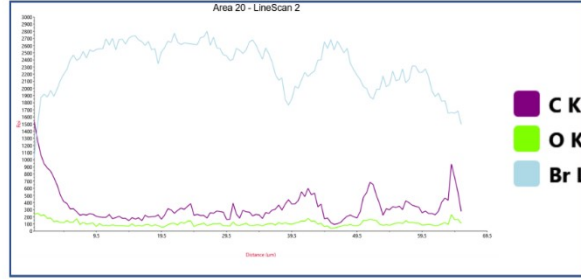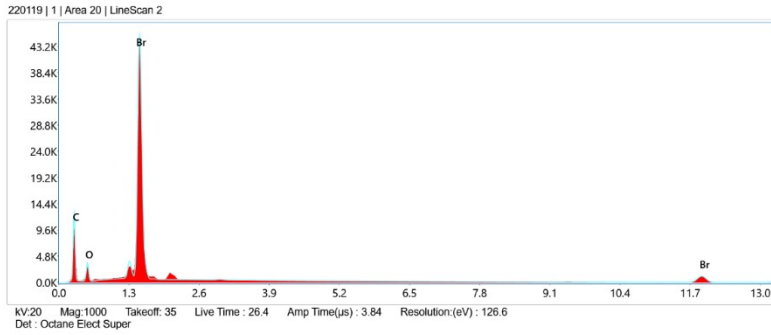

**eZAF Quant Result - Analysis Uncertainty: 99.00 %**

| Element | Weight % | MDL  | Atomic % | Error % | Net Int. | R      | A      | F      |
|---------|----------|------|----------|---------|----------|--------|--------|--------|
| C K     | 66.27    | 0.33 | 86.69    | 10.75   | 2131.27  | 0.8937 | 0.0616 | 1.0000 |
| O K     | 8.51     | 0.12 | 8.35     | 11.31   | 685.27   | 0.9052 | 0.0602 | 1.0000 |
| Br L    | 25.23    | 0.11 | 4.96     | 4.91    | 10900.74 | 0.9263 | 0.6207 | 1.0013 |

220119

Author:

Creation:

Sample Name: 3

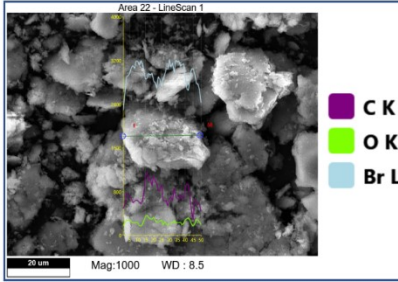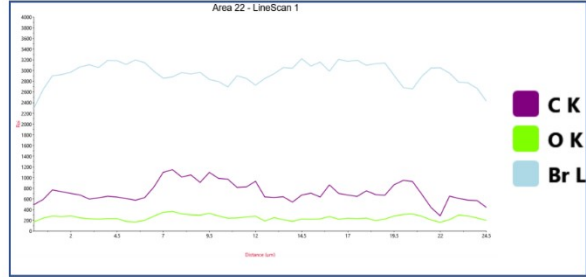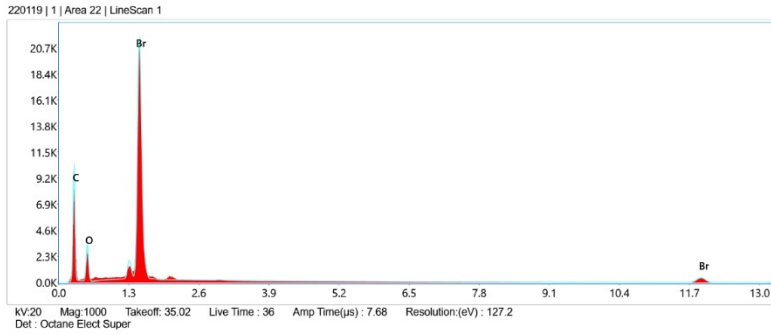

eZAF Quant Result

| Element | Weight % | MDL  | Atomic % | Error % | Net Int. | R      | A      | F      |
|---------|----------|------|----------|---------|----------|--------|--------|--------|
| C K     | 68.96    | 0.3  | 85.01    | 10.67   | 1313.87  | 0.9062 | 0.0759 | 1.0000 |
| O K     | 12.49    | 0.14 | 11.56    | 11.39   | 492.80   | 0.9167 | 0.0615 | 1.0000 |
| Br L    | 18.56    | 0.12 | 3.44     | 5.00    | 3827.80  | 0.9360 | 0.6182 | 1.0012 |
